# Supplementary material for: Policies for biosimilar uptake in Europe: An overview
Source: PLoS One. 2017 Dec 28;12(12):e0190147. doi: 10.1371/journal.pone.0190147 (PMC5746224; doi:10.1371/journal.pone.0190147)
Supplement: S2 Table — (DOCX) [file pone.0190147.s003.docx]

**S2 Table: Brand names of funded biosimilars in different countries in Europe (April 2017)**

| Country | Filgrastim | Epoetin | Somatropin | Insulin | Follitropin | Infliximab | Etanercept |
| --- | --- | --- | --- | --- | --- | --- | --- |
| EU countries | | | | | | | |
| Austria | - Accofil® - Nivestim® - Ratiograstim® - Zarzio® | - Abseamed® - Binocrit® - Retacrit® | - Omnitrope® | - | - | (Inflectra® under review; Remsima® under review) | (Benepali® under review) |
| Belgium | - Accofil® - Nivestim® - Tevagrastim® - Zarzio® | - Binocrit® - Retacrit® | - Omnitrope® | - Abasaglar® | - Bemfola® - Ovaleap® | - Inflectra® - Remsima® | - Benepali® |
| Bulgaria | - Nivestim® - Zarzio® | - Binocrit® - Retacrit® | - Omnitrope® | - Abasaglar® | - Bemfola® | - Inflectra® - Remsima® | - |
| Croatia | - Accofil® - Grastofil® - Nivestim® - Tevagrastim® - Zarzio® | - Binocrit® - Retacrit® | - Omnitrope® | - Abasaglar® | - Ovaleap® - Bemfola® | - Inflectra® - Remsima® | - |
| Czech Republic | - Accofil® - Nivestim® - Tevagrastim® - Zarzio® | - Binocrit® - Retacrit® | - Omnitrope® | - Abasaglar® | - Ovaleap® - Bemfola® | - Inflectra® - Remsima® - Flixabi® | - Benepali® |
| England (UK) | - Nivestim® - Ratiograstim® - Tevagrastim® - Zarzio® | - Binocrit® - Retacrit® | - Omnitrope® | - Abasaglar® | - Bemfola® | - Inflectra® - Remsima® | - Benepali® |
| Estonia | - Nivestim® - Tevagrastim® - Zarzio® | - | - Omnitrope® | - Abasaglar® | - Bemfola® - Ovaleap® | - Inflectra® - Remsima® | - |
| Finland | - Accofil® - Nivestim® - Ratiograstim® - Zarzio® | - Binocrit® - Retacrit® | - Omnitrope® | - Abasaglar® | - Bemfola® | - Inflectra® - Remsima® | - |
| France | - Accofil® - Nivestim® - Ratiograstim® - Tevagrastim® - Zarzio® | - Binocrit® - Retacrit® | - Omnitrope® | - Abasaglar® | - Bemfola® - Ovaleap® | - Inflectra® - Remsima® - Flixabi® | - Benepali® |
| Germany | - Accofil® - Filgrastim Hexal® - Grastofil® - Nivestim® - Ratiograstim® - Tevagrastim® - Zarzio® | - Abseamed® - Binocrit® - Epoetin Alfa Hexal® - Retacrit® - Silapo® | - Omnitrope® | - Abasaglar® | - Bemfola® - Ovaleap® | - Inflectra® - Remsima® - Flixabi® | - Benepali® |
| Ireland | - Grastofil® - Nivestim® - Ratiograstim® - Tevagrastim® - Zarzio® | - Retacrit® | - Omnitrope® | - Abasaglar® | - Bemfola® | - Inflectra® - Remsima® | - Benepali® |
| Italy | - Nivestim® - Accofil® - Ratiograstim® - Tevagrastim® - Zarzio® | - Binocrit® - Retacrit® | - Omnitrope® | - Abasaglar® | - Bemfola® - Ovaleap® | - Inflectra® - Remsima® | - Benepali® |
| Latvia | - Accofil® - Nivestim® - Tevagrastim® - Zarzio® | - Retacrit® | - Omnitrope® | - | - Ovaleap® | - Inflectra® - Remsima® | - |
| Malta | - Nivestim® | - | - | - | - | - Inflectra® | - |
| Netherlands | - Accofil® - Nivestim® - Tevagrastim® - Zarzio® | - Abseamed® - Binocrit® - Retacrit® | - Omnitrope® | - Abasaglar® | - Bemfola® - Ovaleap® | - Inflectra® - Remsima® - Flixabi® | - Benepali® |
| Poland | - Accofil® - Grastofil® - Nivestim® - Tevagrastim® - Zarzio® | - Binocrit® | - Omnitrope® | - Abasaglar® | - Bemfola® - Ovaleap® | - Inflectra® - Remsima® | - Benepali® |
| Portugal | - Accofil® - Nivestim® - Zarzio® | - Binocrit® - Retacrit® | - Omnitrope® | - Abasaglar® | - Bemfola® - Ovaleap® | - Inflectra® - Remsima® | - Benepali® |
| Slovenia | - Accofil® - Grastofil® - Tevagrastim® - Zarzio® | - Binocrit® | - Omnitrope® | - Abasaglar® | - Bemfola® - Ovaleap® | - Inflectra® - Remsima® | - |
| Spain | - Accofil® - Nivestim® - Ratiograstim® - Tevagrastim® - Zarzio® | - Binocrit® - Epoetin alfa Hexal® - Retacrit® | - Omnitrope® | - Abasaglar® | - Bemfola® - Ovaleap® | - Inflectra® - Remsima® - Flixabi® | - Benepali® |
| Sweden | - Accofil® - Nivestim® - Ratiograstim® - Zarzio® | - (Binocrit®: not on the market at the moment, 04/2017) - Retacrit® | - Omnitrope® | - Abasaglar® | - Bemfola® | - Inflectra® - Remsima® | - Benepali® |
| Non-EU countries | | | | | | | |
| Iceland | - Zarzio® | - | - Omnitrope® | - | - Bemfola® | - Inflectra® - Remsima® | - Benepali® |
| Norway | - Nivestim® - Tevagrastim® - Zarzio® | - Retacrit® | - Omnitrope® | - Abasaglar® | - Bemfola® - Ovaleap® | - Inflectra® - Remsima® | - Benepali® |
| Russia | - Tevagrastim® - Zarzio® | - | - Omnitrope® | - | - | - | - |
| Serbia | - Nivestim® - Tevagrastim® - Zarzio® | - Binocrit® | - Omnitrope® | - | - | - Inflectra® - Remsima® | - |
